# Supplementary material for: Sugar-rich larval diet promotes lower adult pathogen load and higher survival after infection in a polyphagous fly
Source: Oxford University Press journal article supplement (doi:10.1242/jeb.243910), 2022-07-29
Supplement: jeb243910supp.pdf [file jeb243910supp.pdf]

**Table S1.** Ingredients of the larval diets

| Ingredient                | Larval diet                           |                      |                         |
|---------------------------|---------------------------------------|----------------------|-------------------------|
|                           | YS 5:1 (protein-biased)               | YS 1.67:1 (balanced) | YS 1:3.4 (sugar-biased) |
| Brewer yeast (g)          | 58.33                                 | 43.8                 | 15.91                   |
| Sugar (g)                 | 11.67                                 | 26.2                 | 54.09                   |
| Agar (g)                  | 2.5                                   | 2.5                  | 2.5                     |
| Nipagin (g)               | 0.375                                 | 0.375                | 0.375                   |
| Sodium benzoate (g)       | 0.375                                 | 0.375                | 0.375                   |
| Wheat Germ oil ( $\mu$ l) | 375                                   | 375                  | 375                     |
| Water                     | Final to 250 ml                       |                      |                         |
| pH                        | Adjust to pH of 3.5 using Citric acid |                      |                         |
